# Supplementary material
Source: PubMed Central journal article supplement (PMC9057633)

**Supplemental Fig. 1 Breeding characteristics in animals used for lipid and cytokine measurements**

Maternal weight change over the course of pregnancy in animals fed standard (Stand., grey line), n-3 (blue line) or n-6 (yellow line) enriched diets (**a**). Number of pups per litter (**b**). Weight of pups at P10 (**c**).

**Supplemental Fig. 2 Levels of fatty acid and chemokines differently affected by diet in male and female groups.**

Levels of fatty acid 20:3 n-9 in blood plasma of male and female pups from mothers fed a standard (Stand.), n-3 enriched or a n-6 enriched diet (**a**). Levels of Eotaxin 2 and CCL22 in brain of males and females born to mothers fed a standard (Stand.), n-3 enriched or a n-6 enriched diet (**b**). Data presented as mean  $\pm$  SD. One-way ANOVA with post-hoc Tukey's multiple comparison test was performed to compare groups within each sex. Individual p-values are listed within figures for data that are significantly different.

**Supplemental Fig. 3 MCAO outcome in male and female pups.**

Volume of brain injury 72 hours after tMCAO reperfusion in male and female pups born to mothers fed a standard (grey), n-3 (blue) or n-6 (yellow) enriched diet (**a**, **b**). Spectrin cleavage 24 hours after reperfusion via caspase-3 -dependent (125KDa band) and calpain-dependent (150KDa band), in injured (ipsi) and non-injured (contra) brain cortex of male and female pups (**c**). Data presented as mean  $\pm$  SD. Kruskal-Wallis test followed by Dunn's post-hoc test (**a**) or two-way ANOVA followed by Tukey's post-hoc test (**c**) was performed to compare groups. Individual p-values are listed within figures for data that are significantly different.

**Supplemental Table 1.** Levels of phospholipid fatty acids in blood plasma of the offspring of mothers fed different diets along with p-values of statistical tests between diets (one-way ANOVA, Welch's ANOVA or Kruskal-Wallis as appropriate).

**Supplemental Table 2.** Total fatty acid lipids in brain of the offspring of mothers fed different diets along with p-values of statistical tests between diets (one-way ANOVA, Welch's ANOVA or Kruskas-Wallis as appropriate).

**Supplemental Table 3.** Levels of cytokines and chemokines in blood plasma of the offspring of mothers fed different diets along with p-values of statistical tests between diets (one-way ANOVA or Kruskas-Wallis as appropriate).

**Supplemental Table 4.** Levels of cytokines and chemokines in the brain of the offspring of mothers fed different diets along with p-values of statistical tests between diets (one-way ANOVA or Kruskas-Wallis as appropriate).

**Supplemental Table 1.** Levels of phospholipid fatty acids in blood plasma of the offspring of mothers fed different diets along with p-values of statistical tests between diets (one-way ANOVA, Welch's ANOVA or Kruskal-Wallis as appropriate).

| Fatty Acid            | Mean±SD (Weight %) |            |            | p-values         |                  |                  |
|-----------------------|--------------------|------------|------------|------------------|------------------|------------------|
|                       | Stand.             | n-3        | n-6        | Stand./n-3       | Stand./n-6       | n-3/n-6          |
| <b>18:3 n-3 (ALA)</b> | 0.07±0.01          | 0.06±0.02  | 0.02±0.01  | 0.085            | <b>&lt;0.001</b> | <b>&lt;0.001</b> |
| <b>20:5 n-3 (EPA)</b> | 0.20±0.05          | 5.66±1.90  | 0.03±0.01  | <b>&lt;0.001</b> | <b>&lt;0.001</b> | <b>&lt;0.001</b> |
| <b>22:5 n-3 (DPA)</b> | 0.24±0.02          | 0.72±0.13  | 0.10±0.03  | <b>&lt;0.001</b> | <b>&lt;0.001</b> | <b>&lt;0.001</b> |
| <b>22:6 n-3 (DHA)</b> | 6.77±0.98          | 11.48±0.93 | 2.51±0.56  | <b>&lt;0.001</b> | <b>&lt;0.001</b> | <b>&lt;0.001</b> |
| <b>18:2 n-6 (LA)</b>  | 26.50±2.15         | 17.00±3.40 | 23.89±3.43 | <b>&lt;0.001</b> | 0.119            | <b>&lt;0.001</b> |
| <b>18:3 n-6</b>       | 0.15±0.01          | 0.11±0.01  | 0.21±0.01  | <b>0.006</b>     | 0.1              | <b>&lt;0.001</b> |
| <b>20:2 n-6</b>       | 1.56±0.44          | 0.57±0.23  | 1.31±0.26  | <b>&lt;0.001</b> | 0.178            | <b>&lt;0.001</b> |
| <b>20:3 n-6</b>       | 2.84±0.49          | 2.24±0.60  | 2.60±0.55  | <b>0.033</b>     | 0.557            | 0.244            |
| <b>20:4 n-6 (AA)</b>  | 11.07±2.15         | 5.85±1.03  | 13.63±1.13 | <b>&lt;0.001</b> | <b>0.006</b>     | <b>&lt;0.001</b> |
| <b>22:4 n-6</b>       | 0.10±0.03          | 0.04±0.01  | 0.29±0.09  | <b>0.033</b>     | <b>&lt;0.001</b> | <b>&lt;0.001</b> |
| <b>22:5 n-6</b>       | 0.12±0.03          | 0.06±0.01  | 1.68±0.16  | <b>&lt;0.001</b> | <b>&lt;0.001</b> | <b>&lt;0.001</b> |
| <b>14:0</b>           | 0.49±0.33          | 0.53±0.28  | 0.60±0.21  | 0.939            | 0.615            | 0.817            |
| <b>16:0</b>           | 25.90±5.00         | 29.33±2.85 | 28.38±2.00 | 0.149            | 0.337            | 0.730            |
| <b>17:0</b>           | 0.15±0.02          | 0.27±0.03  | 0.15±0.01  | <b>&lt;0.001</b> | 1                | <b>&lt;0.001</b> |
| <b>18:0</b>           | 15.70±1.40         | 14.83±0.75 | 14.85±1.04 | 0.171            | 0.186            | 1                |
| <b>20:0</b>           | 0.11±0.02          | 0.10±0.01  | 0.10±0.01  | 0.080            | 0.399            | 0.652            |
| <b>22:0</b>           | 0.11±0.03          | 0.10±0.02  | 0.10±0.02  | 0.876            | 0.454            | 0.746            |
| <b>23:0</b>           | 0.05±0.02          | 0.05±0.01  | 0.04±0.01  | 0.992            | 0.162            | <b>0.013</b>     |
| <b>24:0</b>           | 0.32±0.13          | 0.30±0.08  | 0.25±0.08  | 0.865            | 0.265            | 0.537            |
| <b>16:1 n-7</b>       | 0.23±0.05          | 0.61±0.11  | 0.26±0.03  | 1.000            | 1.000            | <b>&lt;0.001</b> |
| <b>18:1 n-7</b>       | 1.15±0.19          | 1.59±0.20  | 1.10±0.06  | <b>&lt;0.001</b> | 0.690            | <b>&lt;0.001</b> |
| <b>18:1 n-9</b>       | 3.39±0.40          | 5.98±1.61  | 4.48±1.02  | 0.227            | <b>0.012</b>     | 0.394            |
| <b>16:1 n-9</b>       | 0.08±0.03          | 0.10±0.02  | 0.11±0.03  | <b>0.000</b>     | <b>0.011</b>     | <b>0.040</b>     |
| <b>20:1 n-9</b>       | 0.26±0.07          | 0.18±0.05  | 0.28±0.05  | <b>0.004</b>     | 0.561            | <b>&lt;0.001</b> |
| <b>20:3 n-9</b>       | 0.05±0.02          | 0.05±0.01  | 0.06±0.01  | 0.985            | 0.050            | <b>&lt;0.001</b> |
| <b>22:1 n-9</b>       | 0.08±0.05          | 0.63±0.02  | 0.07±0.03  | 1                | 1                | 1                |
| <b>24:1 n-9</b>       | 1.32±0.72          | 1.04±0.32  | 1.13±0.38  | 0.381            | 0.630            | 0.918            |

**Supplemental Table 2.** Total lipid fatty acids in brain of the offspring of mothers fed different diets along with p-values of statistical tests between diets (one-way ANOVA, Welch's ANOVA or Kruskal-Wallis as appropriate).

| Fatty Acid            | Mean±SD (Weight %) |            |            | p-values         |                  |                  |
|-----------------------|--------------------|------------|------------|------------------|------------------|------------------|
|                       | Stand.             | n-3        | n-6        | Stand./n-3       | Stand./n-6       | n-3/n-6          |
| <b>18:3 n-3 (ALA)</b> | 0.02±0             | 0.017±0    | 0.016±0    | 0.081            | <b>0.032</b>     | 0.909            |
| <b>20:5 n-3 (EPA)</b> | 0.04±0.01          | 0.51±0.09  | 0.01±0     | <b>&lt;0.001</b> | <b>&lt;0.001</b> | <b>&lt;0.001</b> |
| <b>22:5 n-3 (DPA)</b> | 0.20±0.03          | 0.76±0.04  | 0.09±0.01  | <b>0.016</b>     | <b>0.016</b>     | <b>&lt;0.001</b> |
| <b>22:6 n-3 (DHA)</b> | 15.49±1.67         | 19.46±1.00 | 8.85±0.69  | <b>&lt;0.001</b> | <b>&lt;0.001</b> | <b>&lt;0.001</b> |
| <b>18:2 n-6 (LA)</b>  | 0.83±0.04          | 0.74±0.06  | 0.76±0.08  | <b>0.005</b>     | <b>0.019</b>     | 0.867            |
| <b>18:3 n-6</b>       | 0.06±0.01          | 0.04±0     | 0.07±0.01  | <b>&lt;0.001</b> | <b>0.023</b>     | <b>&lt;0.001</b> |
| <b>20:2 n-6</b>       | 0.21±0.01          | 0.13±0.01  | 0.20±0.02  | <b>&lt;0.001</b> | 0.146            | <b>&lt;0.001</b> |
| <b>20:3 n-6</b>       | 0.63±0.06          | 0.98±0.05  | 0.48±0.04  | <b>&lt;0.001</b> | <b>&lt;0.001</b> | <b>&lt;0.001</b> |
| <b>20:4 n-6 (AA)</b>  | 14.91±1.13         | 9.59±0.57  | 16.29±1.61 | <b>&lt;0.001</b> | <b>0.019</b>     | <b>&lt;0.001</b> |
| <b>22:4 n-6</b>       | 1.64±0.36          | 0.52±0.20  | 2.00±0.33  | <b>0.002</b>     | 0.36             | <b>&lt;0.001</b> |
| <b>22:5 n-6</b>       | 0.62±0.06          | 0.14±0.03  | 3.97±0.23  | <b>&lt;0.001</b> | <b>&lt;0.001</b> | <b>&lt;0.001</b> |
| <b>14:0</b>           | 1.36±0.41          | 1.62±0.40  | 1.59±0.52  | 0.327            | 0.416            | 0.984            |
| <b>16:0</b>           | 28.46±1.04         | 29.50±1.39 | 29.60±1.90 | 0.211            | 0.160            | 0.987            |
| <b>17:0</b>           | 2.22±2.63          | 2.19±2.57  | 2.09±2.49  | 1                | 0.543            | 0.243            |
| <b>18:0</b>           | 17.17±1.01         | 16.63±0.88 | 17.13±1.13 | 0.399            | 0.994            | 0.460            |
| <b>20:0</b>           | 0.08±0.01          | 0.12±0.10  | 0.08±0.01  | 0.930            | 0.882            | 0.994            |
| <b>22:0</b>           | 0.07±0.01          | 0.07±0.01  | 0.06±0     | 0.967            | 0.601            | 0.456            |
| <b>23:0</b>           | 0.01±0             | 0.01±0     | 0.01±0     | 0.542            | 0.646            | 0.985            |
| <b>24:0</b>           | 0.06±0.01          | 0.07±0.01  | 0.05±0     | <b>0.031</b>     | 0.131            | <b>&lt;0.001</b> |
| <b>16:1 n-7</b>       | 1.42±0.11          | 1.64±0.18  | 1.57±0.13  | <b>0.002</b>     | <b>0.046</b>     | 0.421            |
| <b>18:1 n-7</b>       | 2.04±0.08          | 2.05±0.09  | 2.18±0.09  | 0.998            | <b>0.002</b>     | <b>0.002</b>     |
| <b>16:1 n-9</b>       | 1.45±0.12          | 1.37±0.11  | 1.67±0.17  | 0.395            | <b>&lt;0.001</b> | <b>&lt;0.001</b> |
| <b>18:1 n-9</b>       | 10.17±0.39         | 11.03±0.41 | 10.36±0.49 | <b>&lt;0.001</b> | 0.539            | <b>0.002</b>     |
| <b>20:1 n-9</b>       | 0.21±0.01          | 0.25±0.01  | 0.21±0.01  | <b>&lt;0.001</b> | 0.920            | <b>&lt;0.001</b> |
| <b>20:3 n-9</b>       | 0.16±0.02          | 0.24±0.03  | 0.17±0.03  | <b>&lt;0.001</b> | 0.314            | <b>&lt;0.001</b> |
| <b>22:1 n-9</b>       | 0.28±0.34          | 0.22±0.26  | 0.28±0.33  | 1                | 1                | 1                |
| <b>24:1 n-9</b>       | 0.09±0.01          | 0.89±0.01  | 0.09±0.01  | 0.949            | 0.992            | 0.981            |

**Supplemental Table 3.** Levels of cytokines and chemokines in blood plasma of the offspring of mothers fed different diets along with p-values of statistical tests between diets (one-way ANOVA).

| Cytokine/<br>chemokine         | Mean±SD (pg/ml) |                 |                 | p-values       |                |              |
|--------------------------------|-----------------|-----------------|-----------------|----------------|----------------|--------------|
|                                | Stand.          | n-3             | n-6             | Stand./<br>n-3 | Stand./<br>n-6 | n-3/<br>n-6  |
| <b>IL1b</b>                    | 296.90±110.40   | 302.10±114.50   | 276.20±56.87    | 0.991          | 0.863          | 0.794        |
| <b>IL2</b>                     | 11.79±6.34      | 12.81±6.67      | 11.35±4.05      | 0.914          | 0.980          | 0.832        |
| <b>IL4</b>                     | 51.40±11.10     | 49.57±19.04     | 53.83±13.66     | 0.954          | 0.921          | 0.769        |
| <b>IL6</b>                     | 68.28±29.47     | 72.43±44.81     | 65.09±15.3      | 0.956          | 0.977          | 0.875        |
| <b>IL10</b>                    | 650.80±292.50   | 768.10±497.50   | 553.50±247.10   | 0.897          | 0.836          | 0.548        |
| <b>IL16</b>                    | 636.70±152.10   | 722.40±200.60   | 647.80±104.20   | 0.437          | 0.986          | 0.516        |
| <b>INFg</b>                    | 119.20±50.75    | 136.00±78.81    | 124.90±49.92    | 0.803          | 0.975          | 0.901        |
| <b>GM-CSF</b>                  | 3.65±2.32       | 3.76±2.02       | 4.01±1.57       | 0.989          | 0.894          | 0.949        |
| <b>TNFa</b>                    | 111.50±50.61    | 112.80±64.12    | 98.54±35.38     | 0.112          | 0.996          | 0.122        |
| <b>CCL1</b>                    | 59.75±14.50     | 48.65±9.83      | 59.28±13.87     | 0.952          | 0.463          | 0.640        |
| <b>CCL2/MCP-1</b>              | 368.20±150.20   | 351.90±157.20   | 301.00±76.23    | 0.952          | 0.463          | 0.640        |
| <b>CCL3/MIP1a</b>              | 10.77±5.01      | 12.09±7.74      | 9.18±3.20       | 0.854          | 0.803          | 0.454        |
| <b>CCL4/MIP1b</b>              | 113.50±41.01    | 117.40±50.38    | 109.70±33.74    | 0.973          | 0.975          | 0.897        |
| <b>CCL5/RANTES</b>             | 45.59±13.64     | 55.08±20.64     | 52.82±11.55     | 0.362          | 0.562          | 0.939        |
| <b>CCL7/MCP-3</b>              | 130.30±46.16    | 135.30±20.77    | 134.70±39.27    | 0.951          | 0.959          | 0.999        |
| <b>CCL11/Eotaxin</b>           | 329.60±152.80   | 285.20±110.00   | 297.80±78.01    | 0.663          | 0.800          | 0.968        |
| <b>CCL12</b>                   | 28.53±7.29      | 33.55±7.32      | 32.08±7.96      | 0.277          | 0.518          | 0.892        |
| <b>CCL17</b>                   | 108.40±32.06    | 137.10±81.33    | 120.80±43.94    | 1              | 1              | 1            |
| <b>CCL19/MIP3b</b>             | 1360.00±343.30  | 1376.00±545.50  | 1321.00±201.40  | 0.995          | 0.976          | 0.950        |
| <b>CCL20/MIP3a</b>             | 78.94±30.36     | 65.04±16.24     | 86.26±26.30     | 0.372          | 0.755          | 0.110        |
| <b>CCL22</b>                   | 200.80±55.11    | 170.60±37.46    | 230.90±73.90    | 0.503          | 0.451          | 0.071        |
| <b>CCL24/Eotaxin2</b>          | 3891.00±1065.00 | 3777.00±1875.00 | 3763.00±985.20  | 0.977          | 0.972          | 1.000        |
| <b>CCL27</b>                   | 3487.00±1762.00 | 3397.00±1547.00 | 5223.00±2529.00 | 0.994          | 0.115          | 0.085        |
| <b>CXCL1/KC</b>                | 143.20±58.45    | 153.70±88.44    | 126.10±32.95    | 0.925          | 0.821          | 0.574        |
| <b>CXCL5</b>                   | 2455.00±2064.00 | 4121.00±3853.00 | 699.20±191.80   | 1              | 0.156          | <b>0.019</b> |
| <b>CXCL10</b>                  | 768.50±201.20   | 808.00±245.30   | 781.10±127.20   | 0.883          | 0.988          | 0.944        |
| <b>CXCL11</b>                  | 580.30±151.10   | 594.60±271.00   | 593.50±173.00   | 0.986          | 0.989          | 1            |
| <b>CXCL12</b>                  | 722.80±153.80   | 898.70±330.20   | 797.90±240.70   | 0.268          | 0.771          | 0.614        |
| <b>CXCL16</b>                  | 534.20±222.60   | 533.90±150.30   | 668.00±211.00   | 1              | 0.235          | 0.234        |
| <b>CXCL13/BCA1</b>             | 674.40±244.70   | 759.80±350.60   | 739.80±219.90   | 0.759          | 0.843          | 0.985        |
| <b>CX3CL1/<br/>Fraktalkine</b> | 334.80±48.07    | 329.60±56.44    | 344.30±33.26    | 0.963          | 0.898          | 0.767        |

**Supplemental Table 4.** Levels of cytokines and chemokines in the brain of the offspring of mothers fed different diets along with p-values of statistical tests between diets (one-way ANOVA).

| Cytokine/<br>chemokine         | Mean±SD (pg/mg) |               |              | p-values         |              |         |
|--------------------------------|-----------------|---------------|--------------|------------------|--------------|---------|
|                                | Stand.          | n-3           | n-6          | Stand./n-3       | Stand./n-6   | n-3/n-6 |
| <b>IL1b</b>                    | 52.60±10.74     | 39.50±5.43    | 41.20±9.10   | <b>0.003</b>     | <b>0.009</b> | 0.886   |
| <b>IL2</b>                     | 6.32±2.33       | 4.46±0.95     | 4.15±1.28    | <b>0.022</b>     | <b>0.007</b> | 0.892   |
| <b>IL4</b>                     | 11.22±2.23      | 8.15±1.18     | 8.89±2.11    | <b>0.001</b>     | <b>0.013</b> | 0.610   |
| <b>IL6</b>                     | 5.66±1.40       | 3.96±0.65     | 4.05±1.10    | <b>0.002</b>     | <b>0.003</b> | 0.974   |
| <b>IL10</b>                    | 39.15±20.22     | 19.73±8.39    | 27.83±15.17  | <b>0.022</b>     | 0.346        | 0.317   |
| <b>IL16</b>                    | 312.10±62.31    | 269.00±64.35  | 267.70±56.54 | 0.210            | 0.193        | 0.999   |
| <b>INFg</b>                    | 16.90±3.65      | 11.89±1.87    | 13.56±3.30   | <b>0.001</b>     | <b>0.032</b> | 0.375   |
| <b>GM-CSF</b>                  | 0.26±0.08       | 0.20±0.05     | 0.20±0.05    | 0.054            | 0.074        | 0.988   |
| <b>TNFa</b>                    | 31.28±6.23      | 24.30±3.01    | 26.02±5.37   | <b>0.006</b>     | <b>0.044</b> | 0.682   |
| <b>CCL1</b>                    | 5.01±1.24       | 3.55±0.54     | 3.86±0.89    | <b>0.002</b>     | <b>0.013</b> | 0.699   |
| <b>CCL2/MCP-1</b>              | 30.10±5.12      | 17.96±6.00    | 21.01±7.36   | <b>&lt;0.001</b> | <b>0.01</b>  | 0.538   |
| <b>CCL3/MIP1a</b>              | 5.86±1.15       | 5.35±0.81     | 5.99±1.08    | 0.466            | 0.944        | 0.281   |
| <b>CCL4/MIP1b</b>              | 10.42±2.47      | 7.48±1.69     | 7.75±2.56    | <b>0.014</b>     | <b>0.023</b> | 0.958   |
| <b>CCL5/RANTES</b>             | 3.99±0.90       | 2.70±1.13     | 2.64±0.73    | <b>0.008</b>     | <b>0.004</b> | 0.981   |
| <b>CCL7/MCP-3</b>              | 8.10±1.41       | 6.68±1.17     | 7.19±0.90    | <b>0.020</b>     | 0.169        | 0.546   |
| <b>CCL11/Eotaxin</b>           | 9.29± 2.04      | 7.95±1.68     | 7.45±1.29    | 0.154            | <b>0.035</b> | 0.747   |
| <b>CCL12</b>                   | 3.76±1.26       | 3.01±0.42     | 3.83±1.05    | 0.195            | 0.981        | 0.129   |
| <b>CCL17</b>                   | 15.66±3.21      | 12.67±2.30    | 14.26±2.22   | <b>0.025</b>     | 0.410        | 0.301   |
| <b>CCL19/MIP3b</b>             | 300.10±57.07    | 245.20±28.61  | 240.80±38.61 | <b>0.011</b>     | <b>0.006</b> | 0.965   |
| <b>CCL20/MIP3a</b>             | 7.06±1.70       | 5.26±1.01     | 5.22±0.88    | <b>0.004</b>     | <b>0.003</b> | 0.997   |
| <b>CCL22</b>                   | 2.71±0.53       | 2.02±0.32     | 2.21±0.44    | <b>0.008</b>     | 0.087        | 1       |
| <b>CCL24/Eotaxin2</b>          | 1130.00±245.50  | 825.60±158.90 | 765.80±86.28 | <b>0.041</b>     | <b>0.003</b> | 1       |
| <b>CCL27</b>                   | 558.80±128.30   | 420.70±65.93  | 455.00±80.05 | <b>0.003</b>     | <b>0.031</b> | 0.656   |
| <b>CXCL1/KC</b>                | 6.69±1.76       | 4.59±1.09     | 5.14±1.28    | <b>0.002</b>     | <b>0.028</b> | 0.608   |
| <b>CXCL5</b>                   | 64.25±14.68     | 51.83±10.96   | 52±11.33     | 0.051            | 0.055        | 0.999   |
| <b>CXCL10</b>                  | 213.70±48.62    | 167.50±25.77  | 177.60±28.51 | <b>0.009</b>     | <b>0.048</b> | 0.770   |
| <b>CXCL11</b>                  | 202.40±33.30    | 167.40±48.46  | 170.60±40.77 | 0.111            | 0.159        | 0.980   |
| <b>CXCL12</b>                  | 181.60±39.85    | 140.60±21.53  | 151.50±27.22 | <b>0.007</b>     | 0.054        | 0.658   |
| <b>CXCL16</b>                  | 8.73±1.48       | 7.08±0.88     | 7.23±0.85    | <b>0.003</b>     | <b>0.007</b> | 0.941   |
| <b>CXCL13/BCA1</b>             | 158.20±32.80    | 119.90±14.33  | 123.90±17.14 | <b>0.001</b>     | <b>0.003</b> | 0.901   |
| <b>CX3CL1/<br/>Fraktalkine</b> | 381.40±68.79    | 315.00±47.50  | 329.40±39.64 | <b>0.012</b>     | 0.058        | 0.789   |

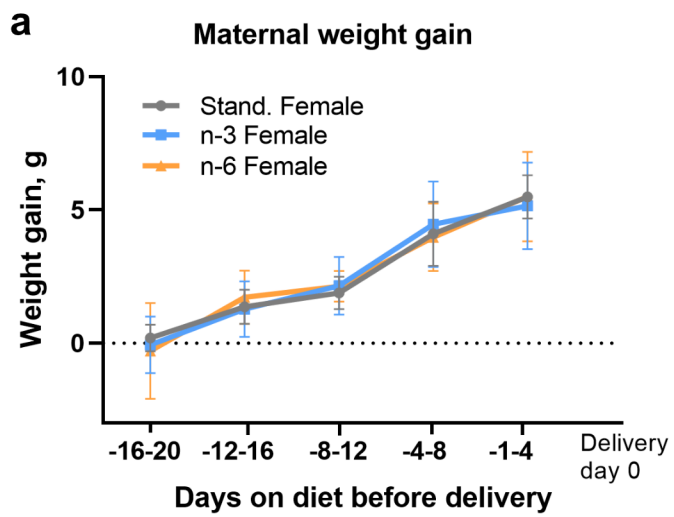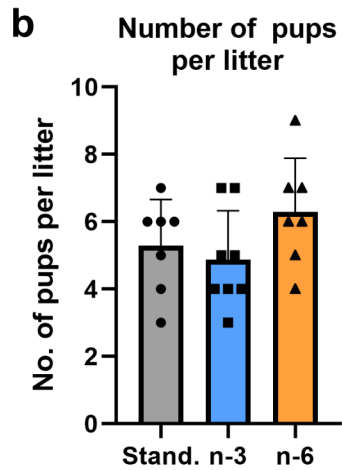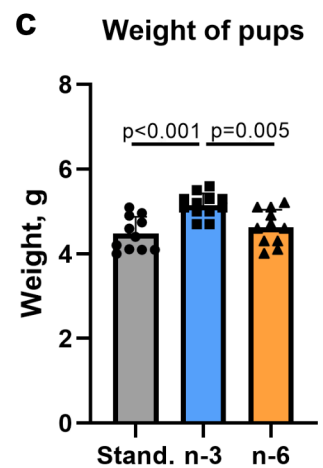

Suppl. Fig 2

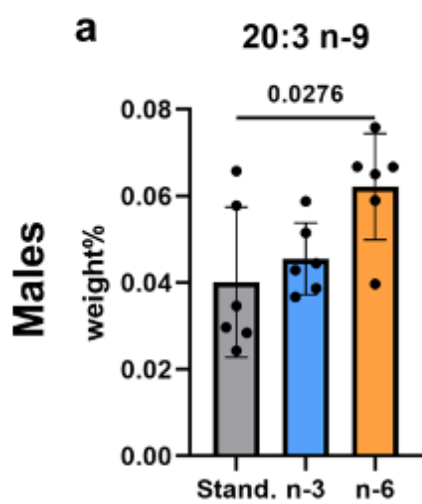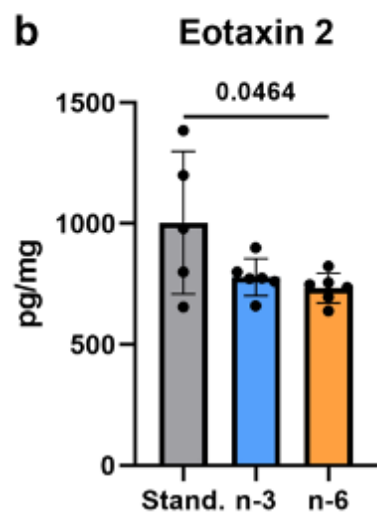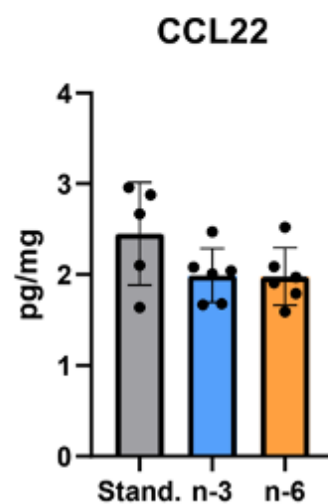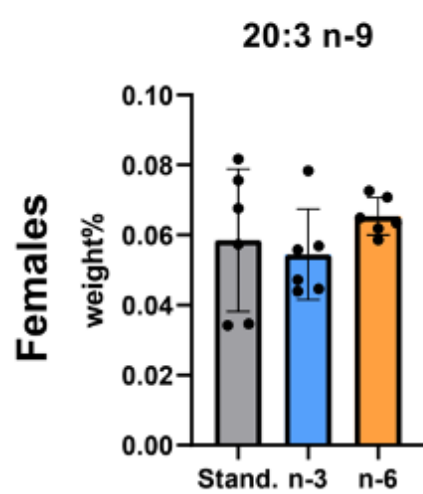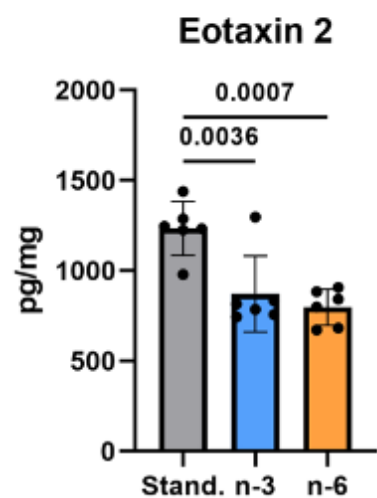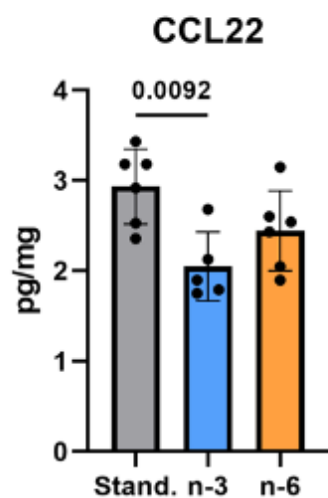



# Suppl. Fig 3

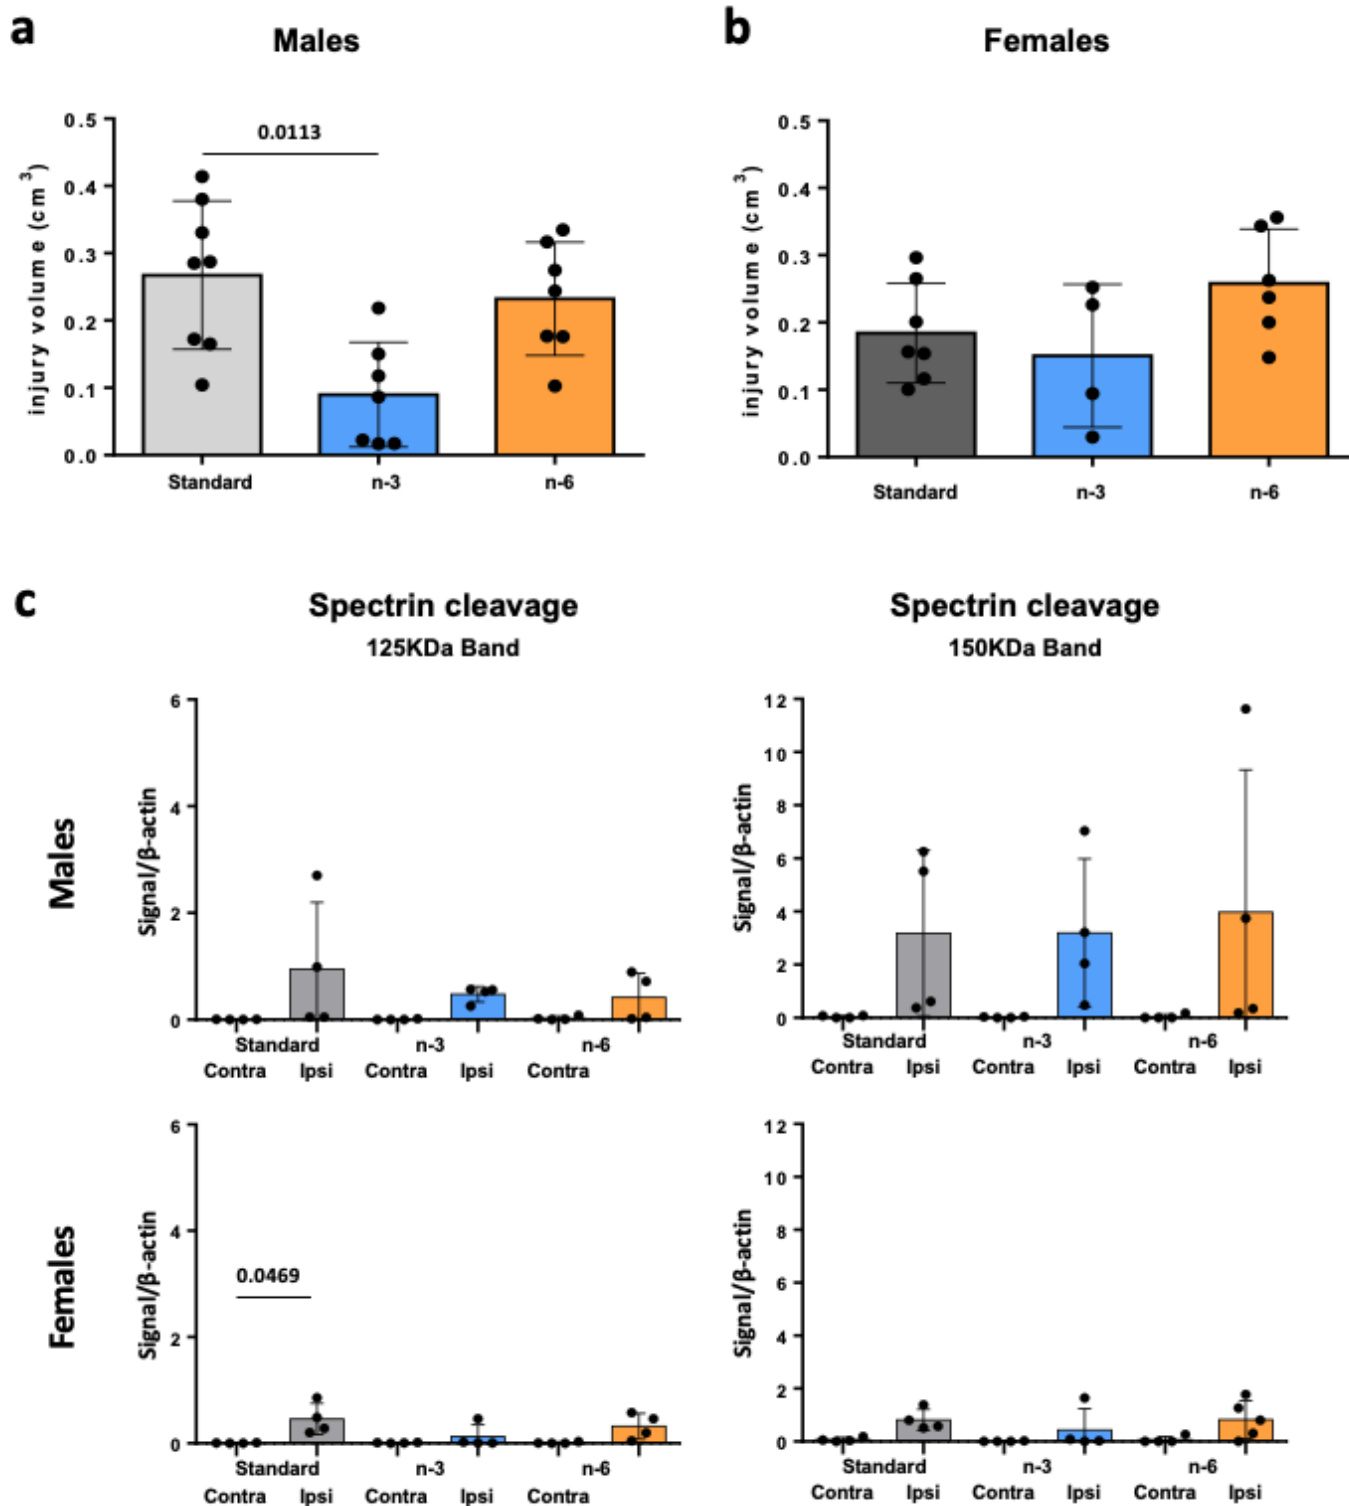

Supplement: NIHMS1799223-supplement-Chumak_et_al_Suppl_Material.pdf [file NIHMS1799223-supplement-Chumak_et_al_Suppl_Material.pdf]
